# Supplementary material for: No Evidence of Robust Noun-Referent Associations in German-Learning 6- to 14-Month-Olds
Source: PubMed Central journal article supplement (PMC8526865; doi:10.3389/fpsyg.2021.718742), 2021-10-06
Supplement: Table_1.pdf [file Table_1.pdf]

## Supplementary Material: Appendix A

Table A1

Pictures presented as stimulus pairs are displayed next to each other. Target words (English Translation), average word frequency (6-7 months/8-10 months/11-14 months/all) and frequency imbalance of stimulus pairs ( $\Delta$ ) - based on parental vocabulary questionnaire and CHILDES database - are presented with each stimulus pair.

|                |                                                                                                                                                                        |                                                                                                                                                                          |                                                                                                                                                                           |
|----------------|------------------------------------------------------------------------------------------------------------------------------------------------------------------------|--------------------------------------------------------------------------------------------------------------------------------------------------------------------------|---------------------------------------------------------------------------------------------------------------------------------------------------------------------------|
| Stimulus Pair  |      |     |     |
| Target word    | Auto (car) Teller (plate)                                                                                                                                              | Baby (baby) Vogel (bird)                                                                                                                                                 | Becher* (cup) Traktor (tractor)                                                                                                                                           |
| Parental freq. | 3.89/4.00/4.06/ <b>4.00</b> 3.33/3.40/3.47/ <b>3.41</b>                                                                                                                | 4.50/3.93/3.29/ <b>3.80</b> 2.60/3.29/3.65/ <b>3.27</b>                                                                                                                  | 3.60/3.93/3.06/ <b>3.50</b> 1.40/1.43/1.94/ <b>1.63</b>                                                                                                                   |
| Parental imb   | $\Delta = 0.59$                                                                                                                                                        | $\Delta = 0.53$                                                                                                                                                          | $\Delta = 1.88$                                                                                                                                                           |
| CHILDES freq   | 5771.00 493.00                                                                                                                                                         | 1869.00 393.00                                                                                                                                                           | 386.00 178.00                                                                                                                                                             |
| CHILDES imb    | $\Delta = 5278.00$                                                                                                                                                     | $\Delta = 1476.00$                                                                                                                                                       | $\Delta = 208.00$                                                                                                                                                         |
| Stimulus Pair  |      |     |     |
| Target word    | Blume (flower) Nase (nose)                                                                                                                                             | Bürste (brush) Windel* (diaper)                                                                                                                                          | Käse (cheese) Schlüssel (key)                                                                                                                                             |
| Parental freq. | 2.40/2.50/3.35/ <b>2.83</b> 3.60/4.07/4.27/ <b>4.02</b>                                                                                                                | 1.60/2.27/2.65/ <b>2.26</b> 4.90/4.71/4.53/ <b>4.68</b>                                                                                                                  | 2.30/2.33/2.62/ <b>2.44</b> 3.00/3.85/3.47/ <b>3.48</b>                                                                                                                   |
| Parental imb   | $\Delta = 1.20$                                                                                                                                                        | $\Delta = 2.42$                                                                                                                                                          | $\Delta = 1.04$                                                                                                                                                           |
| CHILDES freq   | 285.00 955.00                                                                                                                                                          | 39.00 394.00                                                                                                                                                             | 334.00 260.00                                                                                                                                                             |
| CHILDES imb    | $\Delta = 670.00$                                                                                                                                                      | $\Delta = 355.00$                                                                                                                                                        | $\Delta = 74.00$                                                                                                                                                          |
| Stimulus Pair  |   |   |   |
| Target word    | Löffel (spoon) Kissen* (pillow)                                                                                                                                        | Finger (finger) Haare (hair)                                                                                                                                             | Flasche (bottle) Mütze (hat)                                                                                                                                              |
| Parental freq. | 4.10/4.29/4.35/ <b>4.27</b> 2.56/2.13/2.69/ <b>2.45</b>                                                                                                                | 3.90/3.64/3.29/ <b>3.56</b> 3.80/3.92/4.06/ <b>3.95</b>                                                                                                                  | 4.00/3.79/3.35/ <b>3.66</b> 3.60/3.86/3.65/ <b>3.72</b>                                                                                                                   |
| Parental imb   | $\Delta = 1.82$                                                                                                                                                        | $\Delta = 0.39$                                                                                                                                                          | $\Delta = 0.05$                                                                                                                                                           |
| CHILDES freq   | 659.00 91.00                                                                                                                                                           | 611.00 426.00                                                                                                                                                            | 743.00 292.00                                                                                                                                                             |
| CHILDES imb    | $\Delta = 568.00$                                                                                                                                                      | $\Delta = 185.00$                                                                                                                                                        | $\Delta = 451.00$                                                                                                                                                         |

Note. Words, that did *not* derive from the ELFRA-1 (Grimm and Doil, 2006) questionnaire are marked with an asterisk (\*). Parental freq. ranged between 1 to 5 on a Likert-Scale, whilst CHILDES freq. reflects the absolute word count of the described sample out of the German CHILDES database (MacWhinney, 2000). Due to rounding errors within the parental freq. calculating over age group means does not exactly lead to mean frequency across the whole sample.

Table A1 (Continued)

Pictures presented as stimulus pairs are displayed next to each other. Target words (English Translation), average word frequency (6-7 months/8-10 months/11-14 months/all) and frequency imbalance of stimulus pairs ( $\Delta$ ) - based on parental vocabulary questionnaire and CHILDES database - are presented with each stimulus pair

|                |                                                                                   |                                                                                   |                                                                                    |                                                                                     |                                                                                     |                                                                                     |
|----------------|-----------------------------------------------------------------------------------|-----------------------------------------------------------------------------------|------------------------------------------------------------------------------------|-------------------------------------------------------------------------------------|-------------------------------------------------------------------------------------|-------------------------------------------------------------------------------------|
| Stimulus Pair  |  |  |  |  |  |  |
| Target word    | Gabel (fork)                                                                      | Suppe (soup)                                                                      | Gurke* (cucumber)                                                                  | Hose (pants)                                                                        | Hase (rabbit)                                                                       | Käfer* (bug)                                                                        |
| Parental freq. | 2.50/2.80/3.24/2.90                                                               | 1.10/1.43/1.12/1.23                                                               | 3.22/3.13/2.94/3.08                                                                | 4.00/3.60/4.24/3.95                                                                 | 2.20/2.87/2.59/2.60                                                                 | 1.90/2.20/1.53/1.86                                                                 |
| Parental imb   | $\Delta = 1.68$                                                                   |                                                                                   | $\Delta = 0.88$                                                                    |                                                                                     | $\Delta = 0.74$                                                                     |                                                                                     |
| CHILDES freq   | 140.00                                                                            | 158.00                                                                            | 39.00                                                                              | 988.00                                                                              | 698.00                                                                              | 350.00                                                                              |
| CHILDES imb    | $\Delta = 18.00$                                                                  |                                                                                   | $\Delta = 949.00$                                                                  |                                                                                     | $\Delta = 348.00$                                                                   |                                                                                     |
| Stimulus Pair  |  |  |  |  |                                                                                     |                                                                                     |
| Target word    | Puppe (doll)                                                                      | Katze (cat)                                                                       | Tasse (mug)                                                                        | Brille (glasses)                                                                    |                                                                                     |                                                                                     |
| Parental freq. | 2.20/2.38/2.53/2.40                                                               | 2.00/3.07/3.53/3.00                                                               | 3.22/3.13/2.80/3.08                                                                | 3.50/3.57/3.29/3.44                                                                 |                                                                                     |                                                                                     |
| Parental imb   | $\Delta = 0.60$                                                                   |                                                                                   | $\Delta = 0.36$                                                                    |                                                                                     |                                                                                     |                                                                                     |
| CHILDES freq   | 1780.00                                                                           | 1662.00                                                                           | 430.00                                                                             | 311.00                                                                              |                                                                                     |                                                                                     |
| CHILDES imb    | $\Delta = 118.00$                                                                 |                                                                                   | $\Delta = 119.00$                                                                  |                                                                                     |                                                                                     |                                                                                     |

Note. Words, that did *not* derive from the ELFRA-1 (Grimm and Doil, 2006) questionnaire are marked with an asterisk (\*). Parental freq. ranged between 1 to 5 on a Likert-Scale, whilst CHILDES freq. reflects the absolute word count of the described sample out of the German CHILDES database (MacWhinney, 2000). Due to rounding errors within the parental freq. calculating over age group means does not exactly lead to mean frequency across the whole sample.

## References

- Grimm, H., and Doil, H. (2006). ELFRA. Elternfragebögen für die Früherkennung von Risikokindern. Göttingen: Hogrefe Verlag.
- MacWhinney, B. (2000). *The CHILDES Project: Tools for analyzing talk*. Third Edition. Mahwah, NJ: Lawrence Erlbaum Associates.
